# Supplementary material for: Molten salt electrochemical synthesis of sodium titanates as high performance anode materials for sodium ion batteries
Source: Royal Society of Chemistry journal article supplement (doi:10.1039/c5ta03250d), 2015-01-01
Supplement: c5ta03250d1.pdf [file c5ta03250d1.pdf]

## Supporting Information

### Molten Salt Electrochemical Synthesis of Sodium Titanates as High Performance Anode Materials for Sodium Ion Batteries

Haomiao Li, Kangli Wang\*, Wei Li, Shijie Cheng, Kai Jiang\*

State Key Laboratory of Advanced Electromagnetic Engineering and Technology,  
School of Electrical and Electronic Engineering, and State Key Laboratory of  
Materials Processing and Die & Mould Technology, College of Materials Science and  
Engineering, Huazhong University of Science and Technology  
Wuhan, Hubei, China 430074.

E-mail: [kjiang@hust.edu.cn](mailto:kjiang@hust.edu.cn); [klwang@hust.edu.cn](mailto:klwang@hust.edu.cn)

In order to elucidate the correlations between the potential of cyclic voltammograms (CVs) in three-electrode system and the voltage of electrolysis in two-electrode system, the decomposition voltage of salts (NaF-NaCl-NaI) were carefully measured. Typically, in the molten salts system, an iron wire and a graphite crucible were used as work electrode and counter electrode, respectively. The stable current (after ~ 5 minutes of the beginning of applied voltage) was recorded at different voltages (0.5 V, 1.0 V, 1.2 V, 1.5 V, 1.8 V, 2.0 V, 2.3 V, 2.5 V, 2.8 V, 3.0 V, 3.3 V). The results are shown in Fig. S1.

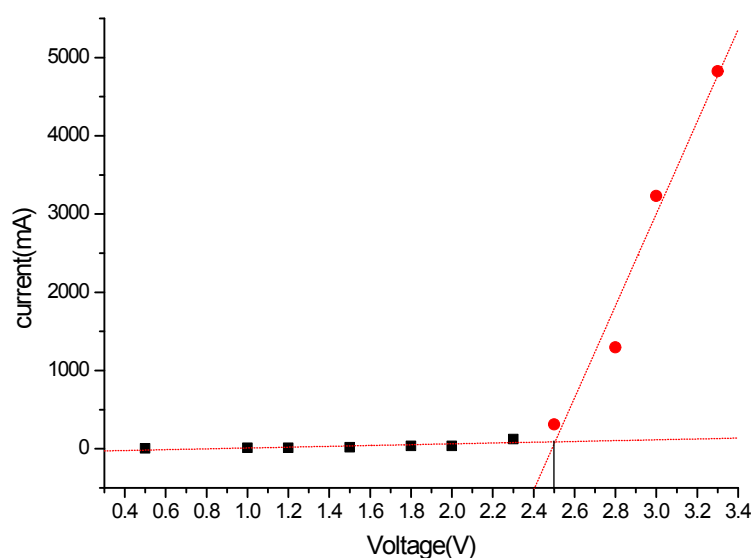

Fig. S1 The current-voltage correlations of molten salts of NaF-NaCl-NaI at 600 °C in electrolytic cell with two electrodes .

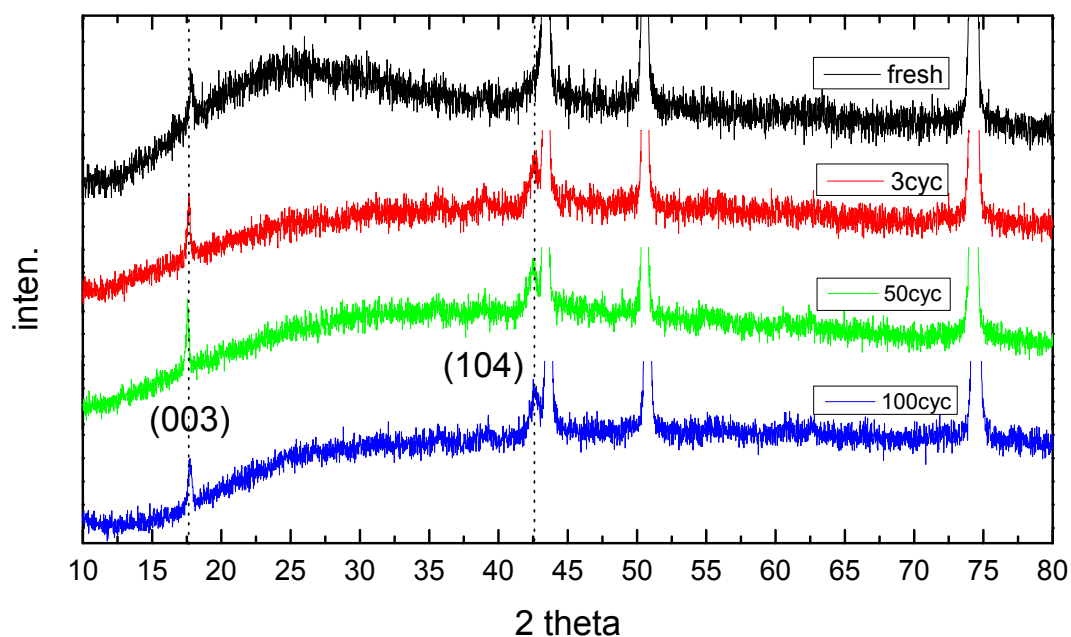

Fig. S2 Ex-situ XRD patterns of the  $\text{Na}_{0.46}\text{TiO}_2@\text{C}$  electrodes and the corresponding charge-discharge cycle numbers (before cycling, after 3 cycles, after 50 cycles, and after 100 cycles) at current density of  $100 \text{ mA g}^{-1}$ . The three strong peaks at  $43.3^\circ$ ,  $50.4^\circ$  and  $74.1^\circ$  are from the Cu foil current collector.

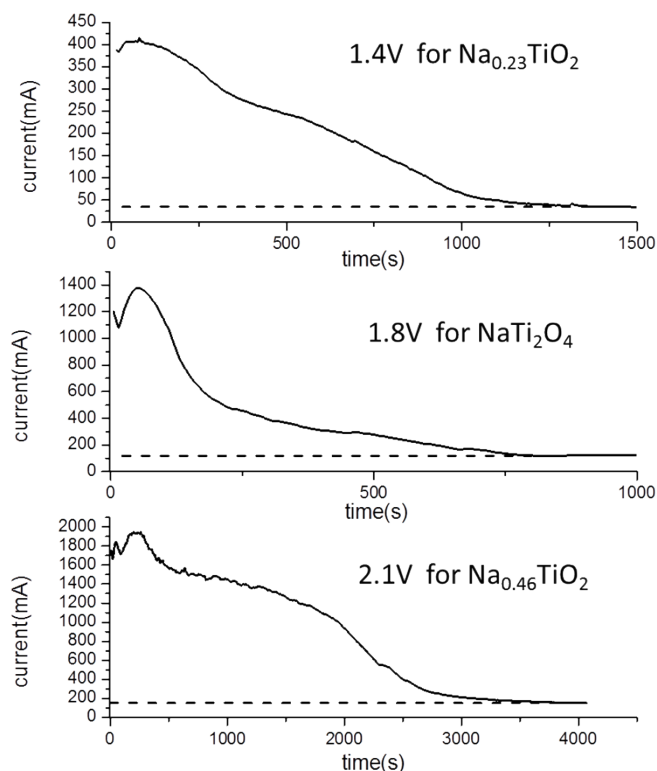

Fig. S3 Current-time curves recorded during electrolysis of solid  $\text{TiO}_2$  in molten  $\text{NaF-NaCl-NaI}$  at  $600^\circ\text{C}$  with the applied voltage of (a) 1.4, (b) 1.8, and (c) 2.1 V. The horizontal dotted lines are used for subtracting the background current.

Table S1 the crystal lattice parameters of all compounds

|                    | Anatase TiO <sub>2</sub>               | Rutile TiO <sub>2</sub>                | Na <sub>0.23</sub> TiO <sub>2</sub>     | Na <sub>0.46</sub> TiO <sub>2</sub>    | NaTi <sub>2</sub> O <sub>4</sub>       |
|--------------------|----------------------------------------|----------------------------------------|-----------------------------------------|----------------------------------------|----------------------------------------|
| structure          | Tetragonal                             | Tetragonal                             | Monoclinic                              | Hexagonal                              | Orthorhombic                           |
| lattice parameters | 3.7852<br>3.7852<br>9.6139<br>90×90×90 | 4.5933<br>4.5933<br>2.9592<br>90×90×90 | 15.159<br>3.844<br>6.464<br>90×106.9×90 | 2.958,<br>2.958,<br>15.41<br>90×90×120 | 9.269,<br>10752,<br>2.9562<br>90×90×90 |

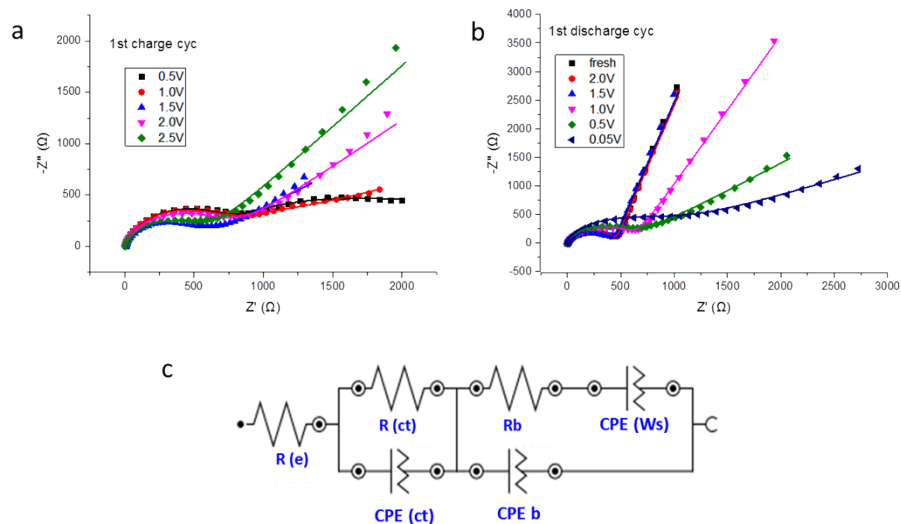

Fig. S4 Nyquist plots of the Na<sub>0.46</sub>TiO<sub>2</sub>@C electrodes in the first cycle (a) charge process and (b) discharge process at 100 mA g<sup>-1</sup>, obtained by applying a sine wave with amplitude of 10 mV in the frequency from 0.1 Hz to 100 kHz. Figure c is corresponding equivalent electrical circuit for fitting the data.

Table S2 Impedance parameters of Na<sub>0.46</sub>TiO<sub>2</sub>@C electrodes in the first cycle at different state of charge and discharge with current density of 100 mA g<sup>-1</sup> (Na as counter electrode). The values above 1.5V are only for reference.

| parameters            |            |      |      |      |      |       |
|-----------------------|------------|------|------|------|------|-------|
| first charge cycle    | 2.5V       | 2.0V | 1.5V | 1.0V | 0.5V |       |
| R <sub>(e)</sub> (Ω)  | 3.56       | 2.74 | 8.4  | 2.20 | 2.20 |       |
| R <sub>(ct)</sub> (Ω) | 554        | 682  | 464  | 693  | 747  |       |
| first discharge cycle | OCV(~2.8V) | 2.0V | 1.5V | 1.0V | 0.5V | 0.05V |
| R <sub>(e)</sub> (Ω)  | 1.91       | 2.43 | 2.04 | 1.71 | 1.12 | 2.61  |
| R <sub>(ct)</sub> (Ω) | 456        | 461  | 439  | 649  | 616  | 649   |
